# Supplementary material
Source: PubMed Central journal article supplement (PMC5114636)
Supplement: JCSM-7-604-s001.pdf [file JCSM-7-604-s001.pdf]

FE - training

FE vs. HE

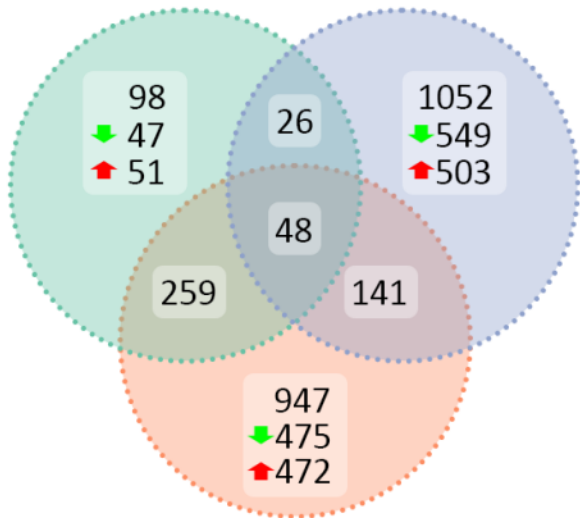

HE - Training
