# Supplementary material
Source: PubMed Central journal article supplement (PMC5114636)

FE vs. YO

HE vs. YO

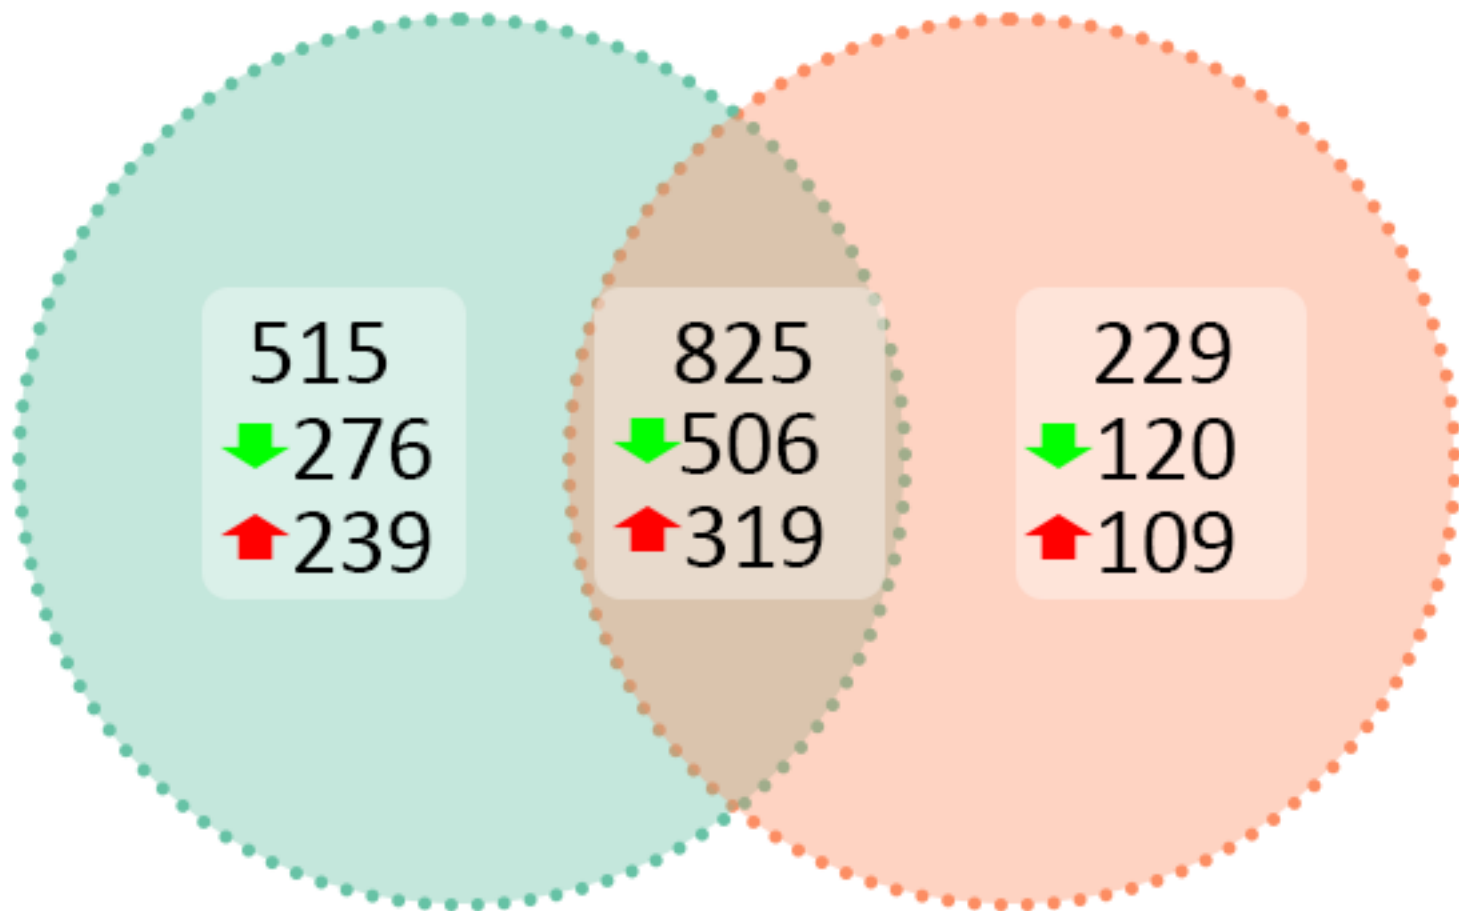

Supplement: JCSM-7-604-s002.pdf [file JCSM-7-604-s002.pdf]
