# Supplementary material
Source: PubMed Central journal article supplement (PMC5114636)
Supplement: JCSM-7-604-s003.pdf [file JCSM-7-604-s003.pdf]

| Canonical Pathway                                                         | FE training | HE training | FE vs HE    | FE vs YO    | HE vs YO    |
|---------------------------------------------------------------------------|-------------|-------------|-------------|-------------|-------------|
| Oxidative Phosphorylation                                                 |             |             | Dark Green  | Light Green |             |
| Mitochondrial Dysfunction                                                 |             |             | Dark Green  | Light Green |             |
| Hepatic Fibrosis / Hepatic Stellate Cell Activation                       | Light Green | Light Green |             |             |             |
| Glycolysis I                                                              | Light Green | Light Green | Light Green | Light Green | Light Green |
| Granulocyte Adhesion and Diapedesis                                       | Light Green | Light Green | Light Green |             |             |
| Agranulocyte Adhesion and Diapedesis                                      | Light Green | Light Green | Light Green |             |             |
| G Protein Signaling Mediated by Tubby                                     | Light Green | Light Green |             | Light Green | Light Green |
| Gluconeogenesis I                                                         | Light Green |             | Light Green | Light Green | Light Green |
| TCA Cycle II (Eukaryotic)                                                 |             |             | Light Green |             |             |
| Intrinsic Prothrombin Activation Pathway                                  | Light Green | Light Green |             | Light Green | Light Green |
| Role of Osteoblasts, Osteoclasts and Chondrocytes in Rheumatoid Arthritis | Light Green | Light Green |             | Light Green |             |
| CCR5 Signaling in Macrophages                                             | Light Green | Light Green |             | Light Green | Light Green |
| Leukocyte Extravasation Signaling                                         | Light Green | Light Green | Light Green |             |             |
| Sphingosine-1-phosphate Signaling                                         | Light Green | Light Green |             | Light Green | Light Green |
| Aspartate Degradation II                                                  |             |             | Light Green | Light Green | Light Green |
| Glutamate Receptor Signaling                                              | Light Green | Light Green |             |             |             |
| Tec Kinase Signaling                                                      | Light Green | Light Green |             |             |             |
| Inhibition of Matrix Metalloproteases                                     | Light Green | Light Green |             |             |             |
| Human Embryonic Stem Cell Pluripotency                                    | Light Green | Light Green | Light Green | Light Green | Light Green |
| Allograft Rejection Signaling                                             | Light Green | Light Green |             |             |             |
| Aldosterone Signaling in Epithelial Cells                                 | Light Green |             | Light Green | Light Green | Light Green |
| Calcium Signaling                                                         | Light Green |             |             | Light Green |             |
| OX40 Signaling Pathway                                                    | Light Green | Light Green |             |             |             |
| Type I Diabetes Mellitus Signaling                                        | Light Green | Light Green |             |             |             |
| Acetyl-CoA Biosynthesis I (Pyruvate Dehydrogenase Complex)                |             |             | Light Green | Light Green | Light Green |
| Gustation Pathway                                                         | Light Green | Light Green |             | Light Green |             |
| Regulation of the Epithelial-Mesenchymal Transition Pathway               | Light Green | Light Green |             | Light Green |             |
| Glutamate Degradation II                                                  |             |             | Light Green | Light Green | Light Green |
| L-cysteine Degradation I                                                  |             |             | Light Green | Light Green | Light Green |
| Aspartate Biosynthesis                                                    |             |             | Light Green | Light Green | Light Green |
| Oxidative Ethanol Degradation III                                         | Light Green | Light Green |             |             |             |
| Communication between Innate and Adaptive Immune Cells                    | Light Green | Light Green |             |             |             |
| Axonal Guidance Signaling                                                 | Light Green | Light Green |             |             |             |
| Tryptophan Degradation X (Mammalian, via Tryptamine)                      | Light Green | Light Green |             |             |             |
| Superpathway of Melatonin Degradation                                     | Light Green | Light Green |             |             |             |
| Dopamine Degradation                                                      | Light Green | Light Green |             |             |             |
| Thioredoxin Pathway                                                       | Light Green | Light Green |             | Light Green | Light Green |
| Melatonin Degradation II                                                  | Light Green | Light Green |             |             |             |
| IL-8 Signaling                                                            | Light Green | Light Green |             |             |             |
| Ethanol Degradation IV                                                    | Light Green | Light Green |             |             |             |
