# Supplementary material
Source: PubMed Central journal article supplement (PMC5114636)

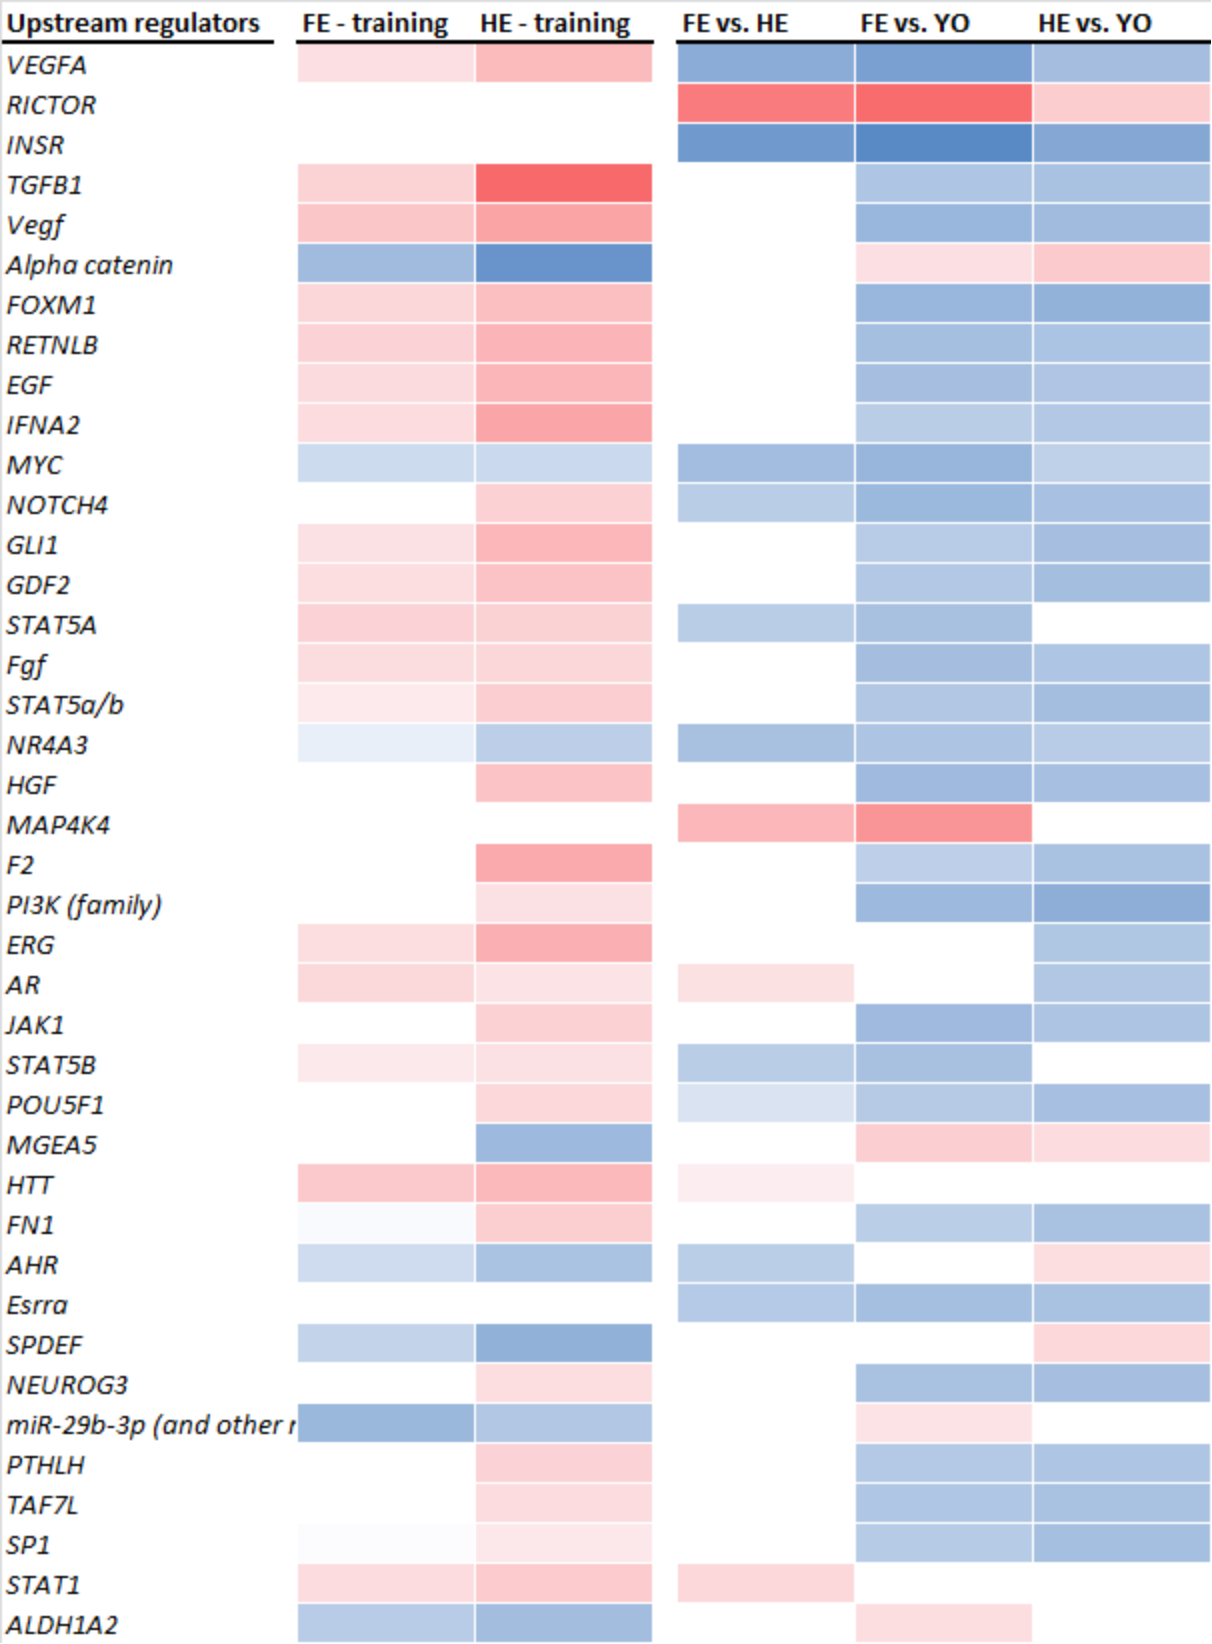

Supplement: JCSM-7-604-s006.pdf [file JCSM-7-604-s006.pdf]
