# Supplementary material
Source: PubMed Central journal article supplement (PMC5114636)

Negative correlation between PCDHG gene expression and leg extension 1RM

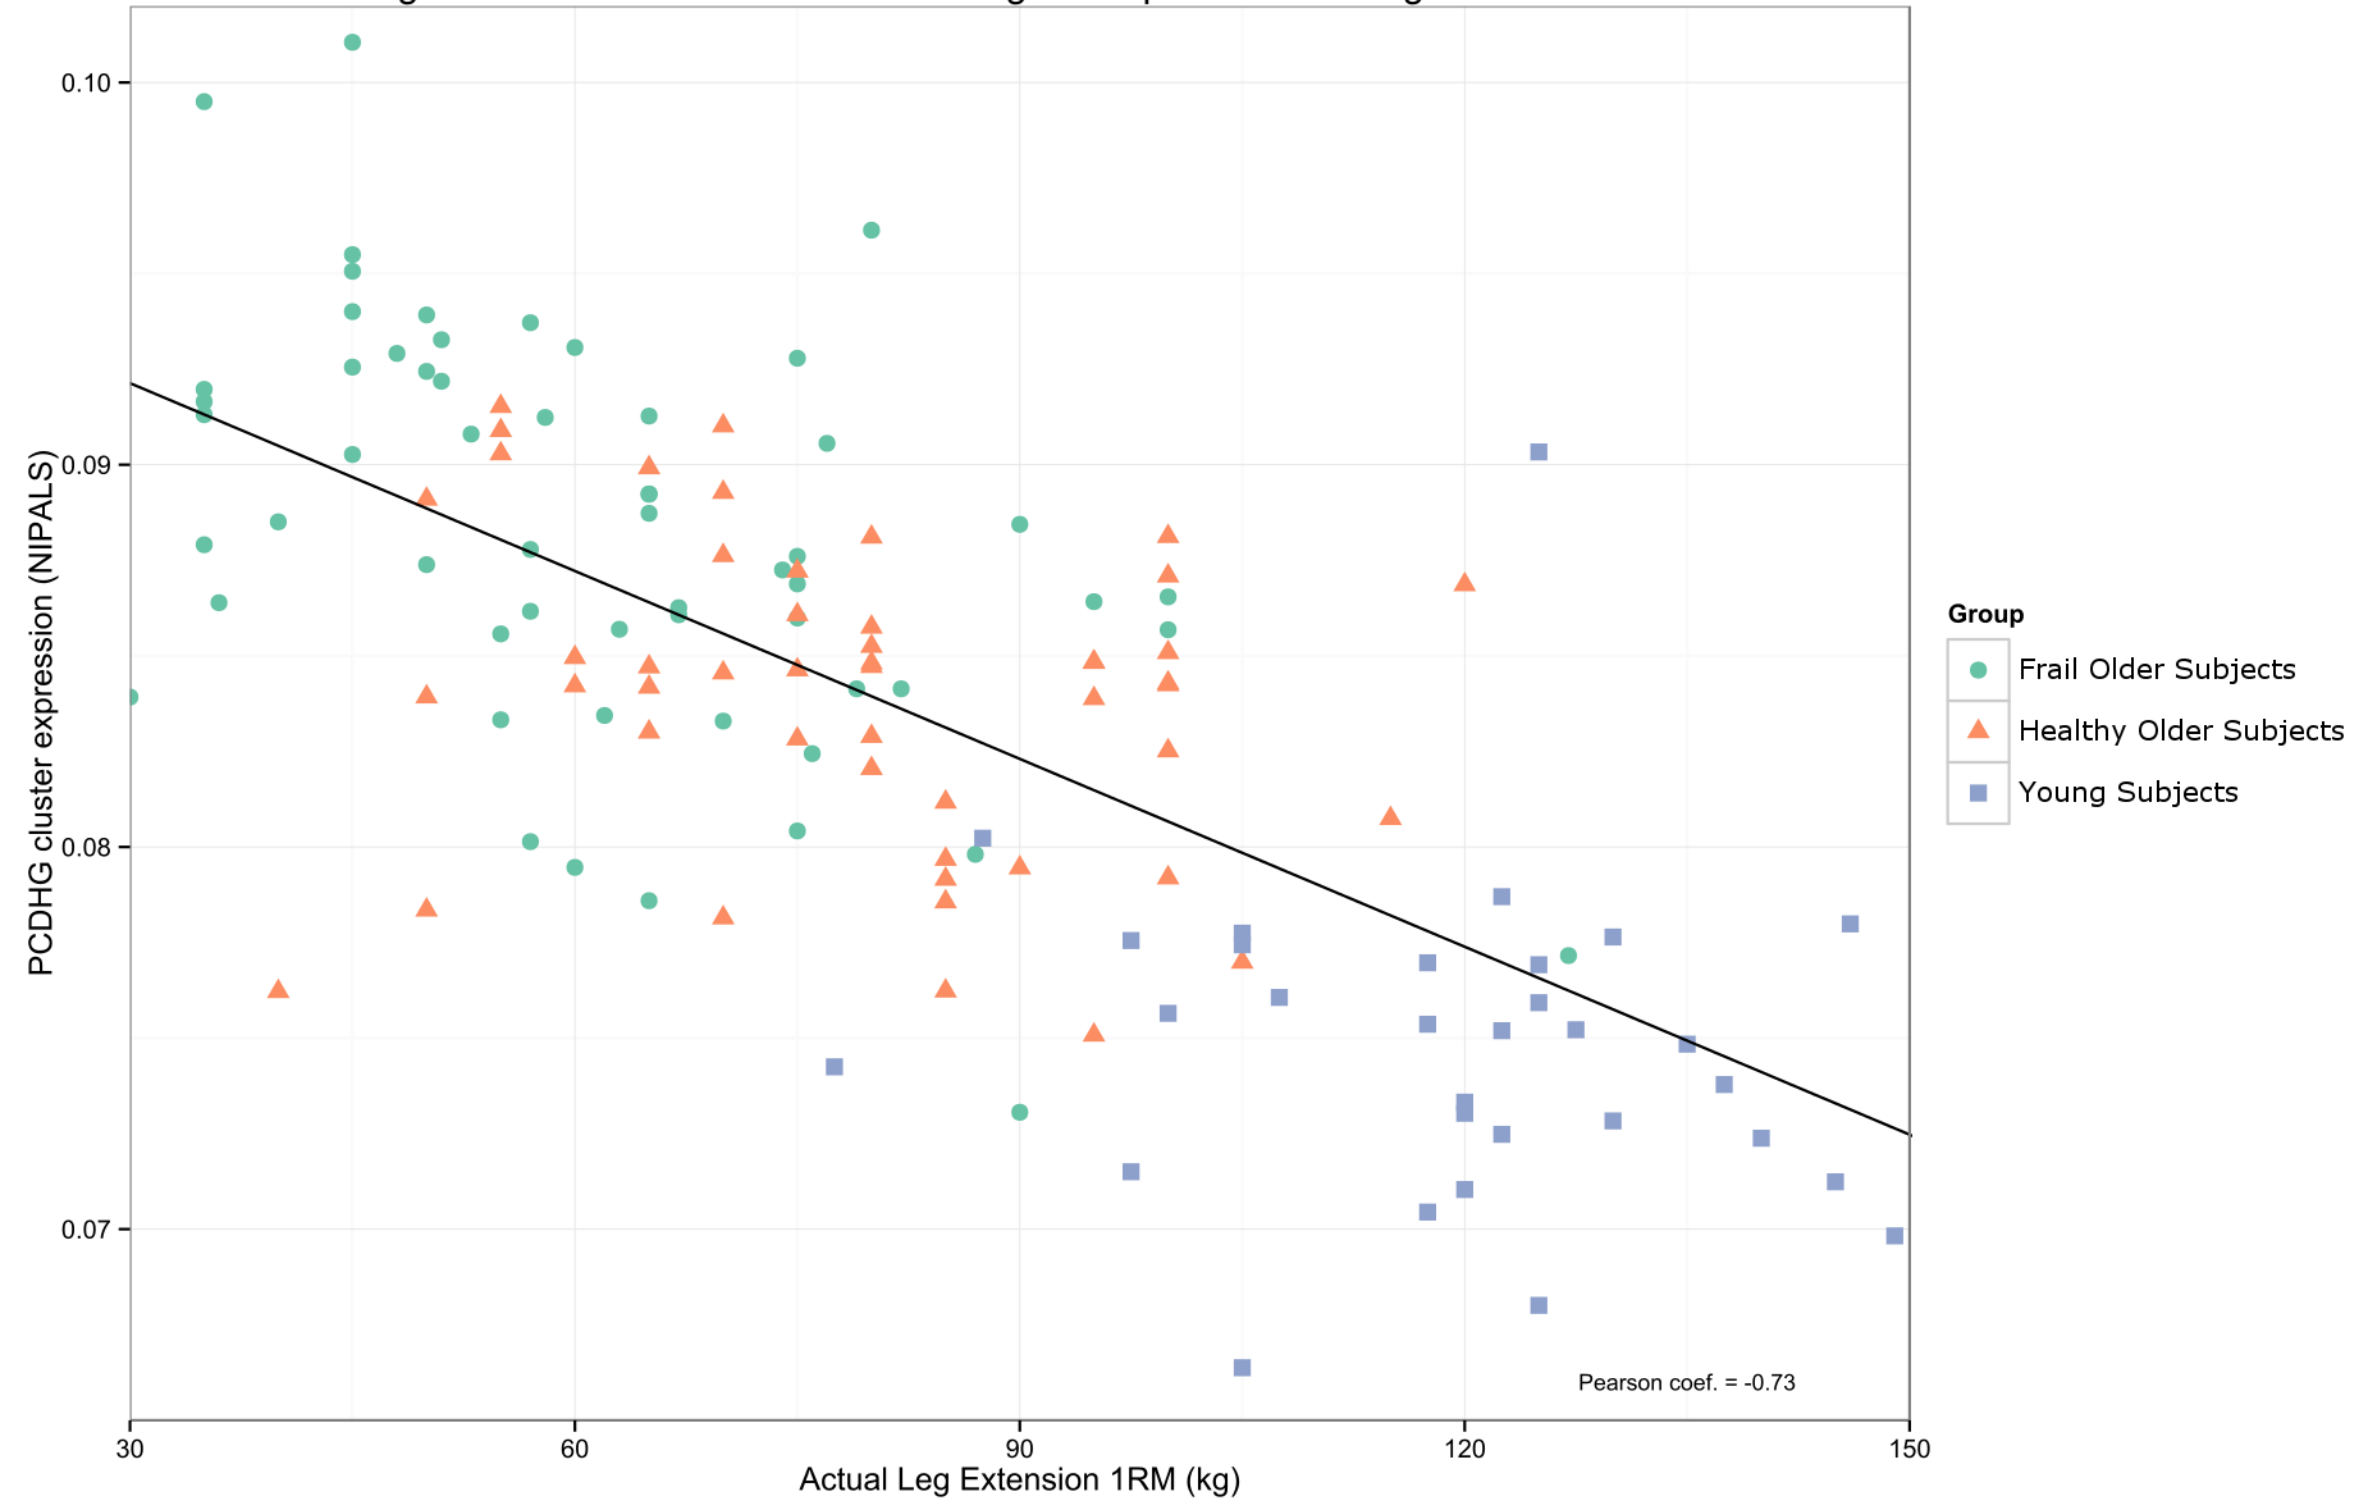

Supplement: JCSM-7-604-s008.pdf [file JCSM-7-604-s008.pdf]
