# Supplementary material
Source: PubMed Central journal article supplement (PMC5114636)

Negative 10 log of p-value

0 1 2 3 4 5 6 7 8 9 10 11 12

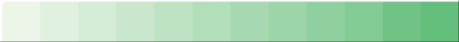

Supplement: JCSM-7-604-s009.pdf [file JCSM-7-604-s009.pdf]
