# Supplementary material
Source: PubMed Central journal article supplement (PMC5114636)

Activation z-score

-2 -1.5 -1 -0.5 0 0.5 1 1.5 2

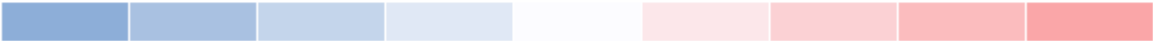

Supplement: JCSM-7-604-s010.pdf [file JCSM-7-604-s010.pdf]
